# Supplementary material
Source: PubMed Central journal article supplement (PMC3444650)

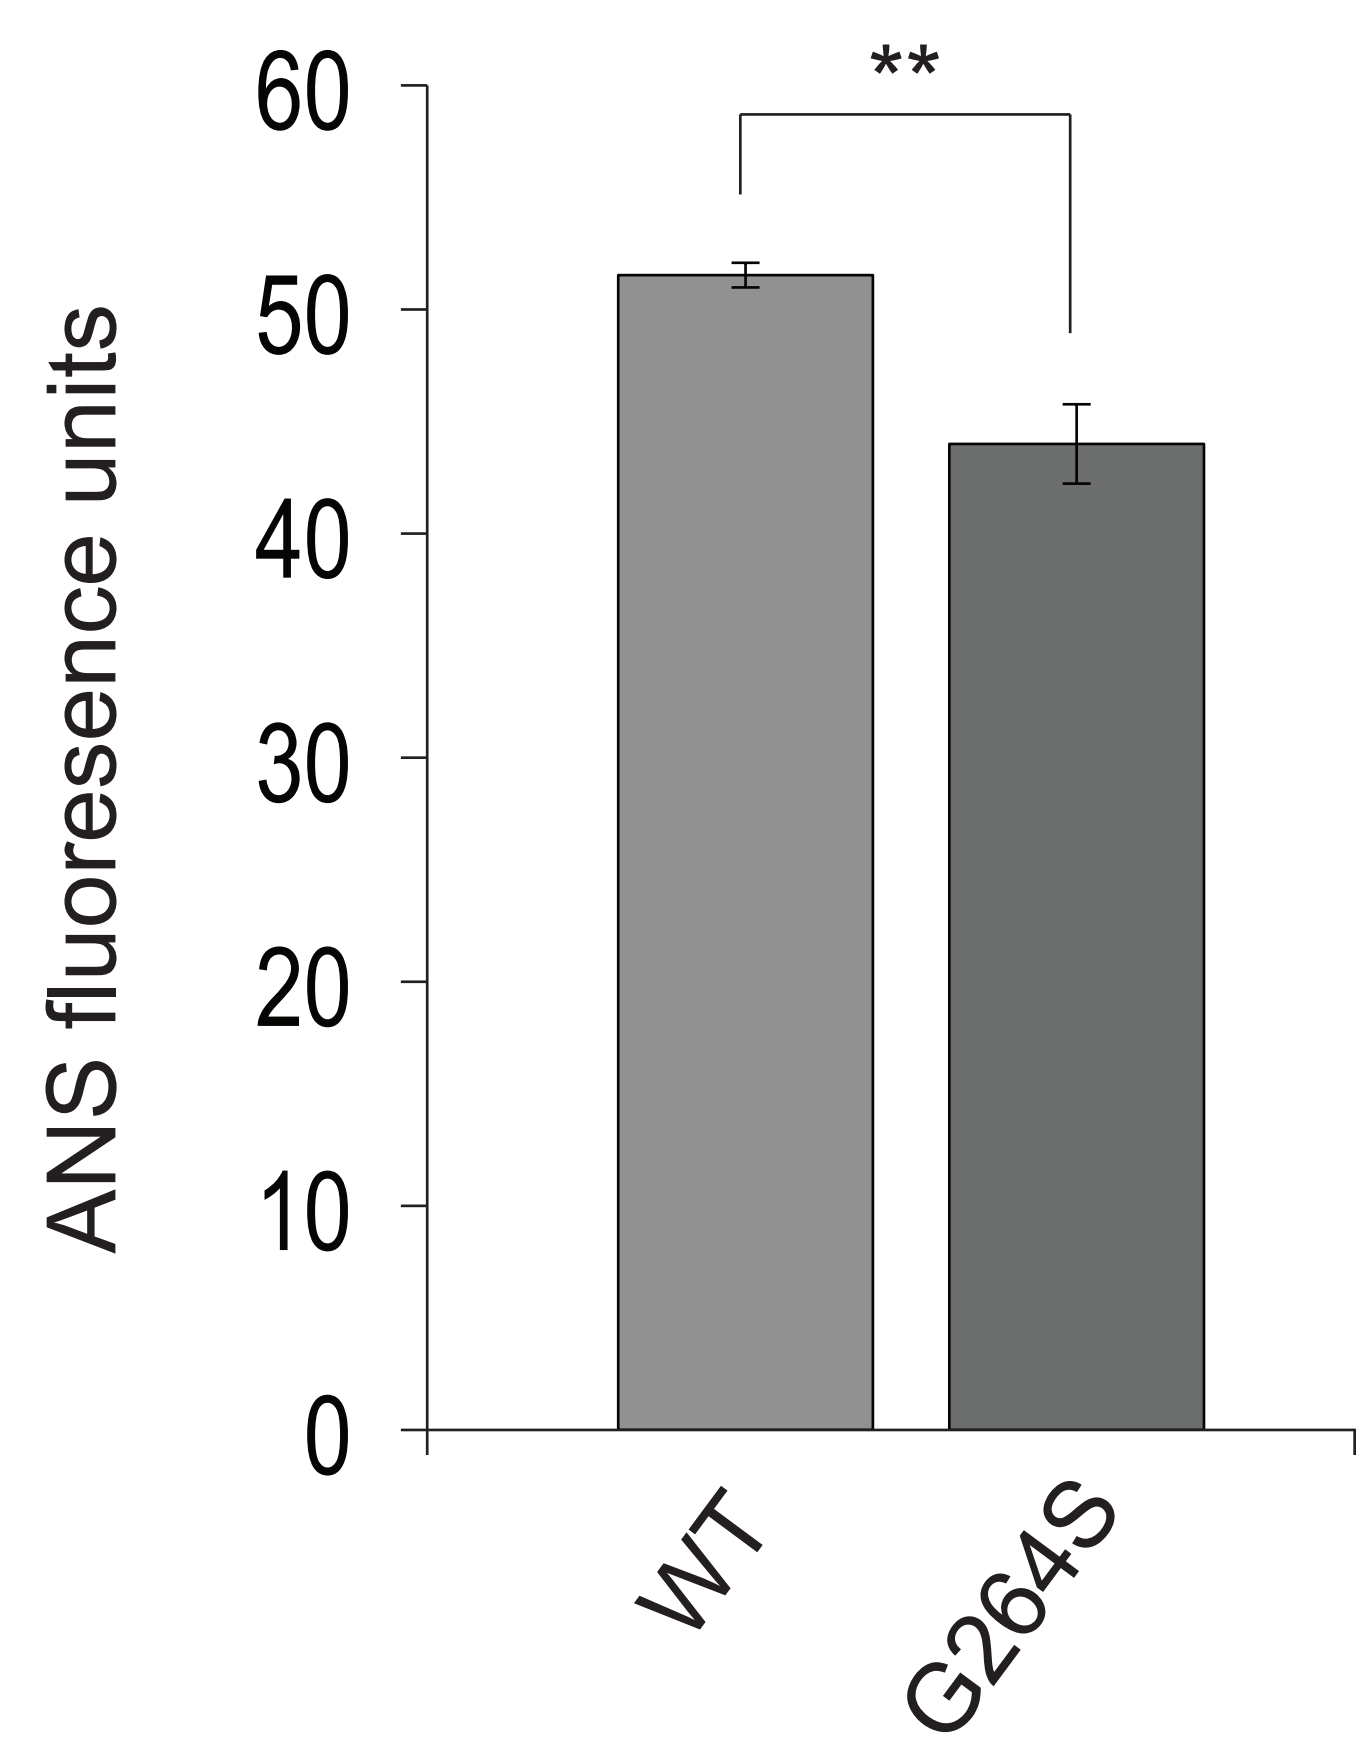

Supplement: NIHMS396077-supplement-02.pdf [file NIHMS396077-supplement-02.pdf]

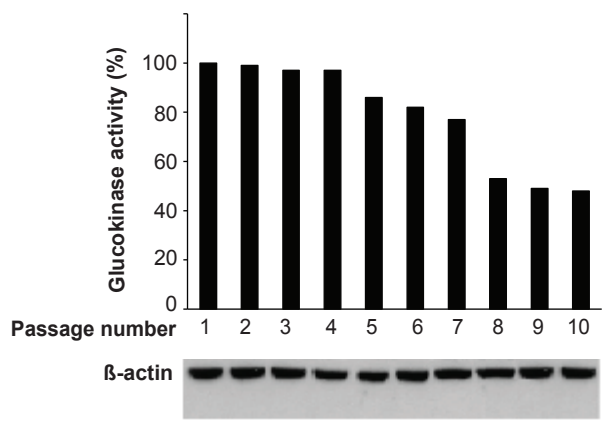

Supplement: NIHMS396077-supplement-03.pdf [file NIHMS396077-supplement-03.pdf]
